# Supplementary material
Source: PubMed Central journal article supplement (PMC3308199)
Supplement: es2043728_si_001.pdf [file es2043728_si_001.pdf]

# SUPPORTING INFORMATION

## Predicting concentrations of organic chemicals in fish based on toxicokinetic models

*Julita Stadnicka\*, Kristin Schirmer, Roman Ashauer*

Total page number: 19, including six tables and five figures.

\* Corresponding author

Phone: +41 587655533

e-mail: [julita.stadnicka@eawag.ch](mailto:julita.stadnicka@eawag.ch)

## 1. Experiments data

### 1.1. Origin of measured internal concentrations

The TOXRES Database yielded seven publications (with 22 different chemicals) for rainbow trout and 16 publications (with 23 different chemicals) for fathead minnow, which fulfilled the criteria listed in main manuscript. Both these species are recommended for toxicity testing (e.g. Fish Full Life Cycle, Fish Partial Life Cycle, acute and bioconcentration tests) by the Organisation for Economic Cooperation and Development (OECD)<sup>1</sup> and the U.S. Environmental Protection Agency<sup>2</sup>.

In the Scopus online database, we searched with the following terms: "internal concentration", "body burden", "body residue" and "tissue residue" in combinations with: "rainbow trout", "*Oncorhynchus mykiss*", "*Salmo gairdneri*", "fathead minnow" and "*Pimephales promelas*". The above terms were searched for on 18 Mar – 29 Apr 2011 in article titles, abstracts and keywords for all document types and for all available publishing years. One publication for rainbow trout and one publication for fathead minnow were found in addition to those identified in the TOXRES Database.

**Table S1.** Chemicals for which measured data of internal concentrations were found.

| Chemical                            | References                                                    |                                                                |
|-------------------------------------|---------------------------------------------------------------|----------------------------------------------------------------|
|                                     | rainbow trout                                                 | fathead minnow                                                 |
| 1,2,3,4-Tetrachlorobenzene          | 1 concentration <sup>3</sup>                                  | 6 concentrations <sup>4</sup>                                  |
| 1,2,3-Trichlorobenzene              | 1 concentration <sup>3</sup>                                  | —                                                              |
| 1,2,4,5-Tetrachlorobenzene          | 1 concentration <sup>3</sup>                                  | —                                                              |
| 1,2,4-Trichlorobenzene              | 1 concentration <sup>3</sup>                                  | 6 concentrations <sup>5</sup>                                  |
| 1,2-Dibromobenzene                  | 4 concentrations <sup>6</sup>                                 | —                                                              |
| 1,2-Dichlorobenzene                 | 1 concentration <sup>3</sup><br>2 concentrations <sup>6</sup> | —                                                              |
| 1,2-Difluorobenzene                 | 2 concentrations <sup>6</sup>                                 | —                                                              |
| 1,3,5-Trichlorobenzene              | 2 concentrations <sup>3</sup>                                 | —                                                              |
| 1,3-Dichlorobenzene                 | —                                                             | 4 concentrations <sup>4</sup>                                  |
| 1,4-Dibromobenzene                  | 2 concentrations <sup>6</sup>                                 | —                                                              |
| 1,4-Dichlorobenzene                 | 1 concentration <sup>3</sup><br>2 concentrations <sup>6</sup> | 3 concentrations <sup>4</sup>                                  |
| 1,4-Difluorobenzene                 | 2 concentrations <sup>6</sup>                                 | —                                                              |
| 2,2',5,5'-Tetrachlorobiphenyl       | 1 concentration <sup>7</sup>                                  | —                                                              |
| 2,3,7,8-Tetrachlorodibenzofuran     | 2 concentrations <sup>8</sup>                                 | —                                                              |
| 2,3,7,8-Tetrachlorodibenzo-p-dioxin | 2 concentrations <sup>8</sup>                                 | —                                                              |
| 2,4,5-Trichlorophenol               | —                                                             | 1 concentration <sup>9</sup>                                   |
| 2,4-Dinitrophenol                   | 1 concentration <sup>10</sup>                                 | —                                                              |
| 4-Nitrophenol                       | 1 concentration <sup>10</sup>                                 | 1 concentration <sup>9</sup>                                   |
| Alachlor                            | —                                                             | 2 concentrations <sup>11</sup>                                 |
| Bromacil                            | —                                                             | 1 concentrations <sup>12</sup>                                 |
| Chlordecone (Kepone)                | —                                                             | 4 concentrations <sup>13</sup>                                 |
| Chlorpyrifos                        | —                                                             | 4 concentrations <sup>14</sup>                                 |
| Dicofol (Kelthane)                  | —                                                             | 2 concentrations <sup>15</sup>                                 |
| Dieldrin                            | 2 concentrations <sup>16</sup>                                | —                                                              |
| Dinoseb                             | —                                                             | 2 concentrations <sup>11</sup>                                 |
| Diuron                              | —                                                             | 1 concentration <sup>12</sup>                                  |
| Dodecylbenzene Sulfonate            | —                                                             | 4 concentrations <sup>17</sup>                                 |
| Endrin                              | —                                                             | 2 concentrations <sup>18</sup>                                 |
| Fenvelerate                         | 3 concentrations <sup>19</sup>                                | 3 concentrations <sup>15</sup>                                 |
| Flucythrinate (AC 222,705)          | —                                                             | 2 concentrations <sup>20</sup>                                 |
| Hexachloro-1,3-butadiene            | 1 concentration <sup>3</sup>                                  | —                                                              |
| Hexachlorobenzene                   | 1 concentration <sup>3</sup>                                  | 6 concentrations <sup>4</sup><br>1 concentration <sup>21</sup> |
| Hexachlorocyclopentadiene           | —                                                             | 2 concentrations <sup>22</sup>                                 |
| Hexachloroethane                    | 1 concentration <sup>3</sup>                                  | —                                                              |
| Octamethylcyclotetrasiloxane        | —                                                             | 1 concentration <sup>23</sup>                                  |
| Pentachlorobenzene                  | 1 concentration <sup>3</sup>                                  | 3 concentrations <sup>4</sup>                                  |
| Pentachlorophenol                   | 1 concentration <sup>24</sup>                                 | 4 concentrations <sup>25</sup>                                 |
| Permethrin                          | —                                                             | 2 concentrations <sup>20</sup>                                 |
| Phenol                              | —                                                             | 1 concentration <sup>9</sup>                                   |

Required parameters from experiments were taken from publications found via Tissue Residue database and Scopis online database, and they are presented for rainbow trout and fathead minnow in **Table S2** and **Table S3** respectively.

**Table S2.** Experimental data required for modelling chemical internal concentrations in rainbow trout

|    | Name                                | CAS      | logK <sub>ow</sub> <sup>a</sup> | Oxygen conc. <sup>b</sup> (mg/l) | Water temp (°C) | Fish weight (kg) | Exposure Time (d) | Exposure concentr. (µg/l) | measured Cint (µg/g) | Ref.          |
|----|-------------------------------------|----------|---------------------------------|----------------------------------|-----------------|------------------|-------------------|---------------------------|----------------------|---------------|
| 1  | 1,2,3,4-Tetrachlorobenzene          | 634662   | 4.6                             | 8.87                             | 15              | 0.25             | 105               | 0.026                     | 0.32                 | <sup>3</sup>  |
| 2  | 1,2,3-Trichlorobenzene              | 87616    | 4.05                            | 8.87                             | 15              | 0.25             | 105               | 0.071                     | 0.21                 | <sup>3</sup>  |
| 3  | 1,2,4,5-Tetrachlorobenzene          | 95943    | 4.64                            | 8.87                             | 15              | 0.25             | 105               | 0.021                     | 0.32                 | <sup>3</sup>  |
| 4  | 1,2,4-Trichlorobenzene              | 120821   | 4.02                            | 8.87                             | 15              | 0.25             | 105               | 0.052                     | 0.18                 | <sup>3</sup>  |
| 5  | 1,2-Dibromobenzene                  | 583539   | 3.64                            | 9.7                              | 12              | 0.056            | 0.07              | 26184.9                   | 424.6                | <sup>6</sup>  |
| 6  | 1,2-Dibromobenzene                  | 583539   | 3.64                            | 9.7                              | 12              | 0.056            | 0.15              | 13446.3                   | 448.2                | <sup>6</sup>  |
| 7  | 1,2-Dibromobenzene                  | 583539   | 3.64                            | 9.7                              | 12              | 0.056            | 0.025             | 25241.3                   | 134.5                | <sup>6</sup>  |
| 8  | 1,2-Dibromobenzene                  | 583539   | 3.64                            | 9.7                              | 12              | 0.056            | 0.23              | 17574.55                  | 566.2                | <sup>6</sup>  |
| 9  | 1,2-Dichlorobenzene                 | 95501    | 3.43                            | 9.7                              | 12              | 0.056            | 0.196             | 6012.3                    | 138.2                | <sup>6</sup>  |
| 10 | 1,2-Dichlorobenzene                 | 95501    | 3.43                            | 9.7                              | 12              | 0.056            | 0.342             | 2381.4                    | 147                  | <sup>6</sup>  |
| 11 | 1,2-Dichlorobenzene                 | 95501    | 3.43                            | 8.87                             | 15              | 0.25             | 105               | 0.94                      | 0.67                 | <sup>3</sup>  |
| 12 | 1,2-Difluorobenzene                 | 367113   | 2.37                            | 9.7                              | 12              | 0.056            | 0.88              | 21564.9                   | 111.8                | <sup>6</sup>  |
| 13 | 1,2-Difluorobenzene                 | 367113   | 2.37                            | 9.7                              | 12              | 0.056            | 0.88              | 15061.2                   | 74.2                 | <sup>6</sup>  |
| 14 | 1,3,5-Trichlorobenzene              | 108703   | 4.19                            | 8.87                             | 15              | 0.25             | 105               | 0.045                     | 0.2                  | <sup>3</sup>  |
| 15 | 1,3,5-Trichlorobenzene              | 108703   | 4.19                            | 8.87                             | 15              | 0.25             | 105               | 0.69                      | 0.64                 | <sup>3</sup>  |
| 16 | 1,4-Dibromobenzene                  | 106376   | 3.79                            | 9.7                              | 12              | 0.056            | 0.058             | 12832.96                  | 205.2                | <sup>6</sup>  |
| 17 | 1,4-Dibromobenzene                  | 106376   | 3.79                            | 9.7                              | 12              | 0.056            | 0.20              | 4765.18                   | 184                  | <sup>6</sup>  |
| 18 | 1,4-Dichlorobenzene                 | 106467   | 3.44                            | 9.7                              | 12              | 0.056            | 0.05              | 3748.5                    | 47                   | <sup>6</sup>  |
| 19 | 1,4-Dichlorobenzene                 | 106467   | 3.44                            | 9.7                              | 12              | 0.056            | 0.83              | 933.45                    | 69.1                 | <sup>6</sup>  |
| 20 | 1,4-Dichlorobenzene                 | 106467   | 3.44                            | 8.87                             | 15              | 0.25             | 105               | 0.67                      | 0.54                 | <sup>3</sup>  |
| 21 | 1,4-Difluorobenzene                 | 540363   | 2.13                            | 9.7                              | 12              | 0.056            | 0.07              | 15517.6                   | 43.4                 | <sup>6</sup>  |
| 22 | 1,4-Difluorobenzene                 | 540363   | 2.13                            | 9.7                              | 12              | 0.056            | 0.17              | 7302.4                    | 33.1                 | <sup>6</sup>  |
| 23 | 2,2',5,5'-Tetrachlorobiphenyl       | 35693993 | 6.09                            | 10.75                            | 11              | 0.767            | 2                 | 10                        | 25.34                | <sup>7</sup>  |
| 24 | 2,3,7,8-Tetrachlorodibenzofuran     | 51207319 | 6.53                            | 8.55                             | 11              | 0.00038          | 28                | 0.00393                   | 0.0106               | <sup>8</sup>  |
| 25 | 2,3,7,8-Tetrachlorodibenzofuran     | 51207319 | 6.53                            | 8.55                             | 11              | 0.00038          | 28                | 0.00041                   | 0.0025               | <sup>8</sup>  |
| 26 | 2,3,7,8-Tetrachlorodibenzo-p-dioxin | 1746016  | 6.8                             | 8.55                             | 11              | 0.00038          | 28                | 0.000176                  | 0.00452              | <sup>8</sup>  |
| 27 | 2,3,7,8-Tetrachlorodibenzo-p-dioxin | 1746016  | 6.8                             | 8.55                             | 11              | 0.00038          | 28                | 0.000038                  | 0.00098              | <sup>8</sup>  |
| 28 | 2,4-Dinitrophenol                   | 51285    | 1.67                            | 6                                | 12              | 0.0008           | 4                 | 1800                      | 16.7                 | <sup>10</sup> |
| 29 | 4-Nitrophenol <sup>c</sup>          | 100027   | 1.91                            | 6                                | 12              | 0.0008           | 4                 | 6600                      | 270.6                | <sup>10</sup> |
| 30 | Dieldrin                            | 60571    | 5.4                             | 9.6                              | 12.5            | 0.0028           | 4                 | 0.99                      | 5.65                 | <sup>16</sup> |
| 31 | Dieldrin                            | 60571    | 5.4                             | 9.6                              | 12.5            | 0.0028           | 4                 | 0.15                      | 0.548                | <sup>16</sup> |
| 32 | Fenvalerate                         | 51630581 | 6.2                             | 9.6                              | 12              | 0.000357         | 70                | 0.135                     | 1.6                  | <sup>19</sup> |
| 33 | Fenvalerate                         | 51630581 | 6.2                             | 9.6                              | 12              | 0.000357         | 70                | 0.08                      | 0.24                 | <sup>19</sup> |
| 34 | Fenvalerate                         | 51630581 | 6.2                             | 9.6                              | 12              | 0.000357         | 70                | 0.018                     | 0.07                 | <sup>19</sup> |
| 35 | Hexachloro-1,3-butadiene            | 87683    | 4.78                            | 8.87                             | 15              | 0.25             | 105               | 0.0034                    | 0.063                | <sup>3</sup>  |
| 36 | Hexachlorobenzene                   | 118741   | 5.73                            | 8.87                             | 15              | 0.25             | 105               | 0.008                     | 0.16                 | <sup>3</sup>  |
| 37 | Hexachloroethane                    | 67721    | 4.14                            | 8.87                             | 15              | 0.25             | 105               | 0.0071                    | 0.0071               | <sup>3</sup>  |
| 38 | Pentachlorobenzene                  | 608935   | 5.17                            | 8.87                             | 15              | 0.25             | 105               | 0.009                     | 0.22                 | <sup>3</sup>  |
| 39 | Pentachlorophenol                   | 87865    | 5.12                            | 10.75                            | 11.5            | 0.735            | 2                 | 1                         | 0.11                 | <sup>24</sup> |

<sup>a</sup> - logK<sub>ow</sub> were taken from EPI Suite: experimental database

<sup>b</sup> - Dissolved oxygen concentration in water

blue colour - chemicals which have been found also for fathead minnow (but from different experiments)

**Table S3.** Experimental data required for modelling chemical internal concentrations in fathead minnow

|    | Name                         | CAS      | logKow <sup>a</sup> | Oxygen conc. <sup>c</sup> (mg/l) | Water temp (°C) | Fish weight (kg) | Exposure Time (d) | Exposure concentr. (µg/l) | measured Cint (µg/g) | Ref.          |
|----|------------------------------|----------|---------------------|----------------------------------|-----------------|------------------|-------------------|---------------------------|----------------------|---------------|
| 1  | 1,2,3,4-Tetrachlorobenzene   | 634662   | 4.6                 | 7.4                              | 25              | 0.000057         | 33                | 410                       | 1100                 | <sup>4</sup>  |
| 2  | 1,2,3,4-Tetrachlorobenzene   | 634662   | 4.6                 | 7.4                              | 25              | 0.000098         | 33                | 250                       | 640                  | <sup>4</sup>  |
| 3  | 1,2,3,4-Tetrachlorobenzene   | 634662   | 4.6                 | 7.4                              | 25              | 0.000102         | 33                | 110                       | 200                  | <sup>4</sup>  |
| 4  | 1,2,3,4-Tetrachlorobenzene   | 634662   | 4.6                 | 7.4                              | 25              | 0.000114         | 33                | 39                        | 94                   | <sup>4</sup>  |
| 5  | 1,2,3,4-Tetrachlorobenzene   | 634662   | 4.6                 | 7.4                              | 25              | 0.000114         | 33                | 19                        | 46                   | <sup>4</sup>  |
| 6  | 1,2,3,4-Tetrachlorobenzene   | 634662   | 4.6                 | 7.4                              | 25              | 0.000112         | 33                | 3                         | 7                    | <sup>4</sup>  |
| 7  | 1,2,4-Trichlorobenzene       | 120821   | 4.02                | 8.1                              | 25.7            | 0.000067         | 32                | 920                       | 477.5                | <sup>5</sup>  |
| 8  | 1,2,4-Trichlorobenzene       | 120821   | 4.02                | 8.1                              | 25.7            | 0.000085         | 32                | 500                       | 160                  | <sup>5</sup>  |
| 9  | 1,2,4-Trichlorobenzene       | 120821   | 4.02                | 8.1                              | 25.7            | 0.000085         | 32                | 280                       | 127.5                | <sup>5</sup>  |
| 10 | 1,2,4-Trichlorobenzene       | 120821   | 4.02                | 8.1                              | 25.7            | 0.000089         | 32                | 140                       | 67.5                 | <sup>5</sup>  |
| 11 | 1,2,4-Trichlorobenzene       | 120821   | 4.02                | 8.1                              | 25.7            | 0.000092         | 32                | 75                        | 31                   | <sup>5</sup>  |
| 12 | 1,2,4-Trichlorobenzene       | 120821   | 4.02                | 8.1                              | 25.7            | 0.000095         | 32                | 15                        | 5                    | <sup>5</sup>  |
| 13 | 1,3-Dichlorobenzene          | 541731   | 3.53                | 6.9                              | 25              | 0.000102         | 32                | 1000                      | 120                  | <sup>4</sup>  |
| 14 | 1,3-Dichlorobenzene          | 541731   | 3.53                | 6.9                              | 25              | 0.000098         | 32                | 560                       | 57                   | <sup>4</sup>  |
| 15 | 1,3-Dichlorobenzene          | 541731   | 3.53                | 6.9                              | 25              | 0.000099         | 32                | 300                       | 29                   | <sup>4</sup>  |
| 16 | 1,3-Dichlorobenzene          | 541731   | 3.53                | 6.9                              | 25              | 0.0001           | 32                | 20                        | 1.3                  | <sup>4</sup>  |
| 17 | 1,4-Dichlorobenzene          | 106467   | 3.44                | 7.3                              | 25              | 0.000087         | 32                | 1000                      | 103                  | <sup>4</sup>  |
| 18 | 1,4-Dichlorobenzene          | 106467   | 3.44                | 7.3                              | 25              | 0.000101         | 32                | 570                       | 69.5                 | <sup>4</sup>  |
| 19 | 1,4-Dichlorobenzene          | 106467   | 3.44                | 7.3                              | 25              | 0.000101         | 32                | 19                        | 6.8                  | <sup>4</sup>  |
| 20 | 2,4,5-Trichlorophenol        | 95954    | 3.72                | 8.22                             | 22              | 0.000115         | 28                | 49.3                      | 100                  | <sup>9</sup>  |
| 21 | 4-Nitrophenol <sup>d</sup>   | 100027   | 1.91                | 8.22                             | 21.9            | 0.000115         | 28                | 44.1                      | 25.1                 | <sup>9</sup>  |
| 22 | Alachlor (Technical grade)   | 15972608 | 3.52                | 7.72                             | 24.7            | 0.000316         | 64                | 1100                      | 50.4                 | <sup>11</sup> |
| 23 | Alachlor (Technical grade)   | 15972608 | 3.52                | 7.72                             | 24.7            | 0.000423         | 64                | 520                       | 23.8                 | <sup>11</sup> |
| 24 | Bromacil (Technical grade)   | 314409   | 2.11                | 7.72                             | 25              | 0.000479         | 17                | 1000                      | 3                    | <sup>12</sup> |
| 25 | Chlordecone (Kepone)         | 143500   | 5.41                | 7                                | 22              | 0.000277         | 60                | 3.1                       | 3.8                  | <sup>13</sup> |
| 26 | Chlordecone (Kepone)         | 143500   | 5.41                | 7                                | 22              | 0.000277         | 60                | 1.2                       | 2.6                  | <sup>13</sup> |
| 27 | Chlordecone (Kepone)         | 143500   | 5.41                | 7                                | 22              | 0.000277         | 60                | 0.31                      | 0.38                 | <sup>13</sup> |
| 28 | Chlordecone (Kepone)         | 143500   | 5.41                | 7                                | 22              | 0.000277         | 60                | 0.17                      | 0.17                 | <sup>13</sup> |
| 29 | Chlorpyrifos                 | 2921882  | 4.96                | 7.5                              | 25.1            | 0.000191         | 200               | 2.68                      | 5.11                 | <sup>14</sup> |
| 30 | Chlorpyrifos                 | 2921882  | 4.96                | 7.5                              | 25.1            | 0.000191         | 200               | 1.21                      | 3.03                 | <sup>14</sup> |
| 31 | Chlorpyrifos                 | 2921882  | 4.96                | 7.5                              | 25.1            | 0.000191         | 200               | 0.63                      | 0.95                 | <sup>14</sup> |
| 32 | Chlorpyrifos                 | 2921882  | 4.96                | 7.5                              | 25.1            | 0.000191         | 200               | 0.27                      | 0.47                 | <sup>14</sup> |
| 33 | Dicofol (Kelthane)           | 115322   | 6.06 <sup>b</sup>   | 7.15                             | 25              | 0.000137         | 28                | 8.9                       | 28                   | <sup>15</sup> |
| 34 | Dicofol (Kelthane)           | 115322   | 6.06 <sup>b</sup>   | 7.15                             | 25              | 0.000137         | 28                | 19                        | 81                   | <sup>15</sup> |
| 35 | Dinoseb (Technical grade)    | 88857    | 3.56                | 7.69                             | 24.7            | 0.000517         | 64                | 48.5                      | 3.05                 | <sup>11</sup> |
| 36 | Dinoseb (Technical grade)    | 88857    | 3.56                | 7.69                             | 24.7            | 0.000679         | 64                | 14.5                      | 0.91                 | <sup>11</sup> |
| 37 | Diuron (Technical grade)     | 330541   | 2.68                | 7.51                             | 24.3            | 0.000563         | 24                | 33.4                      | 4.8                  | <sup>12</sup> |
| 38 | Endrin                       | 72208    | 5.4                 | 6.95                             | 24.8            | 0.0003           | 300               | 0.25                      | 1.8                  | <sup>18</sup> |
| 39 | Endrin                       | 72208    | 5.4                 | 6.95                             | 24.8            | 0.0003           | 300               | 0.14                      | 1                    | <sup>18</sup> |
| 40 | Fenvalerate                  | 51630581 | 6.2                 | 7.15                             | 25              | 0.0002           | 30                | 0.14                      | 0.23                 | <sup>15</sup> |
| 41 | Fenvalerate                  | 51630581 | 6.2                 | 7.15                             | 25              | 0.0002           | 30                | 0.17                      | 0.45                 | <sup>15</sup> |
| 42 | Fenvalerate                  | 51630581 | 6.2                 | 7.15                             | 25              | 0.0002           | 30                | 0.19                      | 0.88                 | <sup>15</sup> |
| 43 | Flucythrinate (AC 222,705)   | 70124775 | 6.2                 | 6.55                             | 25              | 0.000129         | 32                | 0.07                      | 0.17                 | <sup>20</sup> |
| 44 | Flucythrinate (AC 222,705)   | 70124775 | 6.2                 | 6.55                             | 25              | 0.000128         | 32                | 0.03                      | 0.16                 | <sup>20</sup> |
| 45 | Hexachlorobenzene            | 118741   | 5.73                | 7                                | 25              | 0.000165         | 32                | 4.8                       | 97                   | <sup>4</sup>  |
| 46 | Hexachlorobenzene            | 118741   | 5.73                | 7                                | 25              | 0.00015          | 32                | 2.6                       | 46                   | <sup>4</sup>  |
| 47 | Hexachlorobenzene            | 118741   | 5.73                | 7                                | 25              | 0.000164         | 32                | 1.2                       | 27                   | <sup>4</sup>  |
| 48 | Hexachlorobenzene            | 118741   | 5.73                | 7                                | 25              | 0.000172         | 32                | 0.7                       | 15                   | <sup>4</sup>  |
| 49 | Hexachlorobenzene            | 118741   | 5.73                | 7                                | 25              | 0.000159         | 32                | 0.3                       | 8                    | <sup>4</sup>  |
| 50 | Hexachlorobenzene            | 118741   | 5.73                | 7                                | 25              | 0.00017          | 32                | 0.003                     | 0.3                  | <sup>4</sup>  |
| 51 | Hexachlorobenzene            | 118741   | 5.73                | 9.06                             | 20              | 0.000068         | 28                | 5                         | 46.5                 | <sup>21</sup> |
| 52 | Hexachlorocyclopentadiene    | 77474    | 5.04                | 7.9                              | 25              | 0.00013          | 30                | 7.3                       | 0.08                 | <sup>22</sup> |
| 53 | Hexachlorocyclopentadiene    | 77474    | 5.04                | 7.9                              | 25              | 0.00011          | 30                | 3.7                       | 0.04                 | <sup>22</sup> |
| 54 | Octamethylcyclotetrasiloxane | 556672   | 5.1                 | 7.06                             | 21.5            | 0.00048          | 28                | 0.26                      | 2.83                 | <sup>23</sup> |
| 55 | Pentachlorobenzene           | 608935   | 5.17                | 7.2                              | 25              | 0.000099         | 31                | 55                        | 380                  | <sup>4</sup>  |
| 56 | Pentachlorobenzene           | 608935   | 5.17                | 7.2                              | 25              | 0.000107         | 31                | 28                        | 270                  | <sup>4</sup>  |

|    |                          |            |      |      |      |          |    |      |        |               |
|----|--------------------------|------------|------|------|------|----------|----|------|--------|---------------|
| 57 | Pentachlorobenzene       | 608935     | 5.17 | 7.2  | 25   | 0.000104 | 31 | 0.6  | 1.1    | <sup>4</sup>  |
| 58 | Pentachlorophenol        | 87865      | 5.12 | 7.65 | 25   | 0.000081 | 32 | 58.2 | 25.1   | <sup>25</sup> |
| 59 | Pentachlorophenol        | 87865      | 5.12 | 7.65 | 25   | 0.00009  | 32 | 27.6 | 12.3   | <sup>25</sup> |
| 60 | Pentachlorophenol        | 87865      | 5.12 | 7.65 | 25   | 0.000102 | 32 | 12.7 | 5.2    | <sup>25</sup> |
| 61 | Pentachlorophenol        | 87865      | 5.12 | 7.65 | 25   | 0.000103 | 32 | 5.6  | 2.5    | <sup>25</sup> |
| 62 | Permethrin               | 52645531   | 6.5  | 6.55 | 25   | 0.00011  | 32 | 1.4  | 4.51   | <sup>20</sup> |
| 63 | Permethrin               | 52645531   | 6.5  | 6.55 | 25   | 0.000093 | 32 | 0.66 | 2.16   | <sup>20</sup> |
| 64 | Phenol                   | 108952     | 1.46 | 8.22 | 21.9 | 0.000115 | 28 | 32.7 | 1584   | <sup>9</sup>  |
| 65 | Dodecylbenzene Sulfonate | 25155-30-0 | 1.96 | 8.1  | 24   | 0.00019  | 8  | 300  | 0.0157 | <sup>17</sup> |
| 66 | Dodecylbenzene Sulfonate | 25155-30-0 | 1.96 | 8.1  | 24   | 0.00019  | 32 | 126  | 0.0121 | <sup>17</sup> |
| 67 | Dodecylbenzene Sulfonate | 25155-30-0 | 1.96 | 8.1  | 24   | 0.00019  | 32 | 293  | 0.0232 | <sup>17</sup> |
| 68 | Dodecylbenzene Sulfonate | 25155-30-0 | 1.96 | 8.1  | 24   | 0.00019  | 32 | 927  | 0.0606 | <sup>17</sup> |

<sup>a</sup> - logK<sub>ow</sub> were taken from EPI Suite: experimental database

<sup>b</sup> - logK<sub>ow</sub> could not be taken from EPI Suite; value taken from <sup>26</sup>

<sup>c</sup> - Dissolved oxygen concentration in water

blue colour - chemicals which have been found also for rainbow trout (but from different experiments)

## 2. Models

### 2.1. One-compartment A model (developed by Arnot and Gobas<sup>27</sup>)

Abbreviations and symbols used to describe the one-compartment A model for fish are presented in **Table S4**.

**Table S4.** Abbreviations and symbols used to describe the one-compartment A model for fish (from <sup>27</sup> if it is not indicated differently)

| Abbreviation /symbol | Units                                   | Value                    | Description                             |
|----------------------|-----------------------------------------|--------------------------|-----------------------------------------|
| w_w                  | kg                                      | model input              | body wet weight                         |
| K <sub>ow</sub>      | —                                       | model input              | octanol-water partition coefficient     |
| S                    | %                                       | model input              | dissolved oxygen saturation             |
| T                    | °C                                      | model input              | water temperature                       |
| C <sub>w</sub>       | µg · L <sup>-1</sup>                    | model input              | chemical concentration in water         |
| lipid                | kg                                      | model input              | lipid weight                            |
| β                    | —                                       | 0.035*                   | sorption capacity constant              |
| d_w                  | kg                                      | 28% of w_w <sup>28</sup> | body dry weight                         |
| f_lipid              | —                                       | Equation S1              | lipid fraction                          |
| f_NLOM               | —                                       | Equation S2              | fraction of non lipid organic matter    |
| f_water              | —                                       | Equation S3              | water content                           |
| K <sub>bw</sub>      | —                                       | Equation S4              | fish - water partition coefficient      |
| C <sub>ox</sub>      | mg O <sub>2</sub> · L <sup>-1</sup>     | Equation S5              | dissolved oxygen concentration in water |
| G <sub>v</sub>       | L · d <sup>-1</sup>                     | Equation S6              | gill ventilation rate                   |
| E <sub>w</sub>       | —                                       | Equation S7              | gill chemical uptake efficiency         |
| k <sub>in</sub>      | L · kg <sup>-1</sup> · d <sup>-1</sup>  | Equation S8              | aqueous uptake clearance rate constant  |
| k <sub>out</sub>     | kg · kg <sup>-1</sup> · d <sup>-1</sup> | Equation S9              | gill elimination rate constant          |
| k <sub>G</sub>       | d <sup>-1</sup>                         | Equation S10             | growth dilution rate constant           |
| C <sub>int</sub>     | µg · g <sup>-1</sup>                    | Equation S11             | chemical internal concentration         |

\* Although Arnot and Gobas<sup>27</sup> set the beta term equal to 0.035, subsequent work has shown that the true value might be closer to 0.05<sup>29</sup>

Model equations:

- Fish lipid fraction in fish

$$f_{\text{lipid}} = \frac{\text{lipid}}{w_{\text{w}}} \quad (\text{eq. S1})$$

- Fraction of non lipid organic matter in fish

$$f_{\text{NLOM}} = \frac{d_{\text{w}} - \text{lipid}}{w_{\text{w}}} \quad (\text{eq. S2})$$

- Water fraction in fish

$$f_{\text{water}} = \frac{w_{\text{w}} - d_{\text{w}}}{w_{\text{w}}} \quad (\text{eq. S3})$$

- Fish - water partition coefficient

$$K_{\text{bw}} = f_{\text{lipid}} \cdot K_{\text{ow}} + f_{\text{NLOM}} \cdot \beta \cdot K_{\text{ow}} + f_{\text{water}} \quad (\text{eq. S4})$$

- Dissolved oxygen concentration

$$C_{\text{ox}} = (-0.24 \cdot T + 14.04) \cdot \frac{S}{100}, \quad \frac{\text{mg O}_2}{\text{L}} \quad (\text{eq. S5})$$

- Gill ventilation rate

$$G_{\text{v}} = 1400 \cdot \frac{w_{\text{w}}^{0.65}}{C_{\text{ox}}}, \quad \frac{\text{L}}{\text{d}} \quad (\text{eq. S6})$$

- Gill chemical uptake efficiency

$$E_{\text{w}} = \frac{1}{1.85 + \frac{155}{K_{\text{ow}}}} \quad (\text{eq. S7})$$

- Aqueous uptake clearance rate constant

$$k_{\text{in}} = \frac{E_{\text{w}} \cdot G_{\text{v}}}{w_{\text{w}}}, \quad \frac{\text{L}}{\text{kg} \cdot \text{d}} \quad (\text{eq. S8})$$

- Gill elimination rate constant

$$k_{\text{out}} = \frac{k_{\text{in}}}{K_{\text{bw}}}, \quad \frac{\text{kg}}{\text{kg} \cdot \text{d}} \quad (\text{eq. S9})$$

- Growth dilution rate constant

$$k_{\text{G}} = 0.0005 \cdot w_{\text{w}}^{-0.2}, \quad \frac{1}{\text{d}} \quad \text{for temperatures around } 10 \text{ } ^\circ\text{C} \quad (\text{eq. S10})$$

$$k_{\text{G}} = 0.00251 \cdot w_{\text{w}}^{-0.2}, \quad \frac{1}{\text{d}} \quad \text{for temperatures around } 25 \text{ } ^\circ\text{C}$$

- Chemical internal concentration

$$\frac{d}{dt} C_{\text{int}}(t) = \frac{k_{\text{in}}}{1000} \cdot C_w(t) - (k_{\text{out}} + k_G) \cdot C_{\text{int}}(t), \frac{\mu\text{g}}{\text{g} \cdot \text{d}} \quad (\text{eq. S11})$$

## 2.2. One-compartment B model (developed by Hendriks et al. <sup>30</sup>)

Abbreviations and symbols used to describe the one-compartment model B for fish are presented in **Table S5**.

**Table S5.** Abbreviations and symbols used to describe the one-compartment model B for fish (from <sup>30</sup> if it is not indicated differently)

| Abbreviation /symbol | Units                                   | Value                  | Description                            |
|----------------------|-----------------------------------------|------------------------|----------------------------------------|
| w_w                  | kg                                      | model input            | body wet weight                        |
| K <sub>ow</sub>      | —                                       | model input            | octanol-water partition coefficient    |
| C <sub>w</sub>       | μg · L <sup>-1</sup>                    | model input            | chemical concentration in water        |
| lipid                | kg                                      | model input            | lipid weight                           |
| i                    | —                                       | 2 (for animals)        | trophic level                          |
| j                    | —                                       | 0 - from water         | type of chemical uptake                |
| κ                    | —                                       | 0.25                   | rate exponent                          |
| ρ <sub>CH2,i</sub>   | d · kg <sup>-κ</sup>                    | 68 (for animals)       | lipid layer permeation resistance      |
| ρ <sub>H2O,j</sub>   | d · kg <sup>-κ</sup>                    | 2.8 · 10 <sup>-3</sup> | water layer diffusion resistance       |
| γ <sub>0</sub>       | kg <sup>-κ</sup> · d <sup>-1</sup>      | 200 water breathing    | water absorption-excretion coefficient |
| γ <sub>1</sub>       | kg <sup>-κ</sup> · d <sup>-1</sup>      | 0.0006                 | biomass (re)production coefficient     |
| q <sub>T:c</sub>     | kg · kg <sup>-1</sup>                   | 1 (cold-blooded)       | temperature correction factor          |
| f_lipid              | —                                       | Equation S12           | lipid fraction                         |
| k <sub>in</sub>      | L · kg <sup>-1</sup> · d <sup>-1</sup>  | Equation S13           | substance absorption rate constant     |
| k <sub>out</sub>     | kg · kg <sup>-1</sup> · d <sup>-1</sup> | Equation S14           | substance excretion rate constant      |
| k <sub>G</sub>       | d <sup>-1</sup>                         | Equation S15           | growth dilution rate constant          |
| C <sub>int</sub>     | μg · g <sup>-1</sup>                    | Equation S16           | chemical internal concentration        |

- Fish lipid fraction in fish

$$f_{\text{lipid}} = \frac{\text{lipid}}{w_w} \quad (\text{eq. S12})$$

- Substance absorption rate constant

$$k_{\text{in}} = \frac{w_w \cdot w^{-\kappa}}{\rho_{\text{H2O},j} + \frac{\rho_{\text{CH2},i}}{K_{\text{ow}}} + \frac{1}{\gamma_0}}, \frac{\text{L}}{\text{kg} \cdot \text{d}} \quad (\text{eq. S13})$$

- Substance excretion rate constant

$$k_{\text{out}} = \frac{1}{f_{\text{lipid}} \cdot (K_{\text{ow}} - 1) + 1} \cdot k_{\text{in}}, \frac{\text{kg}}{\text{kg} \cdot \text{d}} \quad (\text{eq. S14})$$



- Growth dilution rate constant

$$k_G = q_{T;c} \cdot \gamma_1 \cdot w_w^{-\kappa}, \quad \frac{\text{kg}}{\text{kg} \cdot \text{d}} \quad (\text{eq. S15})$$

- Chemical internal concentration

$$\frac{d}{dt} C_{\text{int}}(t) = \frac{k_{\text{in}}}{1000} \cdot C_w(t) - (k_{\text{out}} + k_G) \cdot C_{\text{int}}(t), \quad \frac{\mu\text{g}}{\text{g} \cdot \text{d}} \quad (\text{eq. S16})$$

### 2.3. Physiologically Based Toxicokinetic model (based on<sup>31-34</sup>)

Abbreviations and symbols used to describe the PBTK model for fish are presented in **Table S6**.

**Table S6.** Abbreviations and symbols used to describe the PBTK model for fish (from<sup>31-34</sup> if it is not indicated differently)

| Abbreviation/<br>symbol | Units                               | Value                                                    |                              | Description                                                         |
|-------------------------|-------------------------------------|----------------------------------------------------------|------------------------------|---------------------------------------------------------------------|
|                         |                                     | rainbow trout                                            | fathead minnow               |                                                                     |
| w_w                     | kg                                  | model input                                              |                              | body wet weight                                                     |
| K <sub>ow</sub>         | —                                   | model input                                              |                              | octanol-water partition coefficient                                 |
| C <sub>w</sub>          | μg · L <sup>-1</sup>                | model input                                              |                              | chemical concentration in inspired water                            |
| T                       | °C                                  | model input                                              |                              | water temperature                                                   |
| C <sub>ox</sub>         | mg O <sub>2</sub> · L <sup>-1</sup> | model input                                              |                              | dissolved oxygen concentration in water                             |
| lipid                   | —                                   | model input                                              |                              | lipid content of fish (fraction of body weight)                     |
| K                       | —                                   | for T > 10 °C, K = 3.05 · 10 <sup>-4</sup> <sup>35</sup> |                              | constant in equation S18                                            |
| n                       | —                                   | for T > 10 °C, n = 1.855 <sup>35</sup>                   |                              | constant in equation S18                                            |
| m                       | —                                   | for T > 10 °C, m = -0.138 <sup>35</sup>                  |                              | constant in equation S18                                            |
| α <sub>b</sub>          | —                                   | 0.014 <sup>36</sup>                                      | 0.019 <sup>36</sup>          | lipid content of blood tissue (fraction of body weight)             |
| α <sub>f</sub>          | —                                   | 0.942 <sup>36</sup>                                      | 1.010 <sup>36</sup>          | lipid content of fat tissue (fraction of body weight)               |
| α <sub>k</sub>          | —                                   | 0.052 <sup>36</sup>                                      | —                            | lipid content of kidney tissue (fraction of body weight)            |
| α <sub>l</sub>          | —                                   | 0.045 <sup>36</sup>                                      | 0.074 <sup>36</sup>          | lipid content of liver tissue (fraction of body weight)             |
| α <sub>m</sub>          | —                                   | 0.030 <sup>36</sup>                                      | 0.025 <sup>36</sup>          | lipid content of muscle tissue (fraction of body weight)            |
| γ <sub>b</sub>          | —                                   | 0.839 <sup>36</sup>                                      | 0.876 <sup>36</sup>          | water content of blood tissue, (fraction of body weight)            |
| γ <sub>f</sub>          | —                                   | 0.050 <sup>36</sup>                                      | 0.016 <sup>36</sup>          | water content of fat tissue, (fraction of body weight)              |
| γ <sub>k</sub>          | —                                   | 0.789 <sup>36</sup>                                      | —                            | water content of kidney tissue, (fraction of body weight)           |
| γ <sub>l</sub>          | —                                   | 0.746 <sup>36</sup>                                      | 0.766 <sup>36</sup>          | water content of liver tissue, (fraction of body weight)            |
| γ <sub>m</sub>          | —                                   | 0.769 <sup>36</sup>                                      | 0.806 <sup>36</sup>          | water content of muscle tissue, (fraction of body weight)           |
| lipid <sub>i</sub>      | —                                   | Equation S20                                             | Equation S21                 | Lipid content of lean tissue (fraction of body weight)              |
| V <sub>l</sub>          | L                                   | 0.012 · w_w                                              | 0.018 · w_w <sup>37,38</sup> | volume of liver compartment                                         |
| V <sub>f</sub>          | L                                   | Equation S22                                             |                              | volume of fat compartment                                           |
| V <sub>m</sub>          | L                                   | Equation S23                                             | Equation S24                 | volume of poorly perfused compartment (mainly white muscle)         |
| V <sub>r</sub>          | L                                   | 0.063 · w_w                                              | 0.072 · w_w <sup>37,38</sup> | volume of richly perfused compartment                               |
| V <sub>k</sub>          | L                                   | 0.009 · w_w                                              | —                            | volume of kidney compartment                                        |
| Q <sub>c</sub>          | L · h <sup>-1</sup>                 | Equation S17 <sup>31</sup>                               |                              | cardiac output                                                      |
| Q <sub>l</sub>          | L · h <sup>-1</sup>                 | 0.029 · Q <sub>c</sub>                                   | 0.024 · Q <sub>c</sub>       | blood flow to the liver compartment                                 |
| Q <sub>f</sub>          | L · h <sup>-1</sup>                 | 0.085 · Q <sub>c</sub>                                   | 0.010 · Q <sub>c</sub>       | blood flow to the fat compartment                                   |
| Q <sub>m</sub>          | L · h <sup>-1</sup>                 | 0.600 · Q <sub>c</sub>                                   | 0.440 · Q <sub>c</sub>       | blood flow to the poorly perfused compartment (mainly white muscle) |
| Q <sub>r</sub>          | L · h <sup>-1</sup>                 | 0.230 · Q <sub>c</sub>                                   | 0.526 · Q <sub>c</sub>       | blood flow to the richly perfused compartment                       |
| Q <sub>k</sub>          | L · h <sup>-1</sup>                 | 0.056 · Q <sub>c</sub>                                   | —                            | blood flow to the kidney compartment                                |
| VO <sub>2</sub>         | mg O <sub>2</sub> · h <sup>-1</sup> | Equation S18 <sup>35</sup>                               |                              | oxygen consumption rate for 1kg fish                                |
| Q <sub>w</sub>          | L · h <sup>-1</sup>                 | Equation S19                                             |                              | effective respiratory volume                                        |

|           |                                   |                            |              |                                                                                                                                                             |
|-----------|-----------------------------------|----------------------------|--------------|-------------------------------------------------------------------------------------------------------------------------------------------------------------|
| $P_{bw}$  | —                                 | Equation S25 <sup>36</sup> |              | chemical blood:water partition coefficient                                                                                                                  |
| $P_i$     | —                                 | Equation S26 <sup>36</sup> |              | liver:blood ( $P_l$ ), fat:blood ( $P_f$ ), muscle:blood ( $P_m$ ) and kidney:blood ( $P_k$ ) (only for rainbow trout) partition coefficients of a chemical |
| $P_r$     | —                                 | Equation S27               |              | chemical richly perfused tissue:blood partition coefficient                                                                                                 |
| $A_i$     | $\mu\text{g}$                     | Equation S28 <sup>36</sup> |              | chemical amount in fat ( $A_f$ ), poorly perfused ( $A_m$ ) and richly perfused ( $A_r$ ) compartments                                                      |
| $A_l$     | $\mu\text{g}$                     | Equation S29               |              | chemical amount in the liver compartment                                                                                                                    |
| $A_k$     | $\mu\text{g}$                     | Equation S230              | —            | chemical amount in the kidney compartment                                                                                                                   |
| $C_{int}$ | $\mu\text{g}$                     | Equation S31               | Equation S32 | average concentration of the chemical in the whole organism                                                                                                 |
| $C_{art}$ | $\mu\text{g} \cdot \text{L}^{-1}$ | Equation S33               |              | chemical concentration in arterial blood                                                                                                                    |
| $C_{ven}$ | $\mu\text{g} \cdot \text{L}^{-1}$ | Equation S34               | Equation S35 | chemical concentration in venous blood                                                                                                                      |

- Cardiac output

$$Q_c = (0.23 \cdot T - 0.78) \cdot \left( \frac{1000 \cdot w - w}{500} \right)^{-0.1} \cdot w - w^{0.75}, \frac{\text{L}}{\text{h}} \quad (\text{eq. S17})$$

- Oxygen consumption rate

$$VO_2 = K \cdot \left( 32 + T \cdot \frac{9}{5} \right)^n \cdot \left( \frac{w - w}{0.4536} \right)^m \cdot \frac{10000}{24}, \frac{\text{mgO}_2}{\text{h}} \quad (\text{eq. S18})$$

- Effective respiratory volume

$$Q_w = \frac{VO_2}{C_{ox} - 0.2 \cdot C_{ox}} \cdot w - w^{0.75}, \frac{\text{L}}{\text{h}} \quad (\text{eq. S19})$$

Lipid content of lean tissue was calculated based on the simplification presented by Nichols and colleagues.<sup>39</sup> In their work, it was assumed that the lipid content of lean tissue (which consists of all tissues except of adipose fat) does not depend on the lipid content of whole body. Thus, in our study, lean tissue includes: liver, richly perfused, poorly perfused and kidney (only for rainbow trout) compartments, and its lipid content was calculated based on values from Table S6 (note, that to calculate lipid content of lean tissue, here, the volume of poorly perfused tissues was equal to  $0.818 \cdot w - w$ <sup>34</sup> and  $0.888 \cdot w - w$ <sup>37</sup> for rainbow trout and fathead minnow, respectively).

- Lipid content of lean tissue – rainbow trout

$$\text{lipid}_l = \frac{V_l \cdot a_l + V_r \cdot a_r + V_m \cdot a_m + V_k \cdot a_k}{V_l + V_r + V_m + V_k} \quad (\text{eq. S20})$$

- Lipid content of lean tissue – fathead minnow

$$\text{lipid}_l = \frac{V_l \cdot a_l + V_r \cdot a_r + V_m \cdot a_m}{V_l + V_r + V_m} \quad (\text{eq. S21})$$

- Volume of fat compartment – rainbow trout

$$V_f = w - w \cdot \frac{\text{lipid} - \text{lipid}_l}{\alpha_f - \text{lipid}_l}, \text{L} \quad (\text{eq. S22})$$

**NOTE:** This assumption will not work in extreme situations when the lipid content of whole body is lower than lipid content of lean tissue (which is assumed to be independent of whole body lipid content). These conditions could happen e.g. during starvation.

- Volume of poorly perfused compartment (mainly white muscle) – rainbow trout  

$$V_m = w_w - (V_l + V_f + V_k + V_r), L \quad (\text{eq. S23})$$

- Volume of poorly perfused compartment (mainly white muscle) – fathead minnow  

$$V_m = w_w - (V_l + V_f + V_r), L \quad (\text{eq. S24})$$

- Blood:water partition coefficient of a chemical  

$$P_{bw} = 10^{0.72 \cdot \log K_{ow} + 1.04 \cdot \log(\alpha_b) + 0.86} + \gamma_b \quad (\text{eq. S25})$$

- Liver:blood, fat:blood, muscle:blood, and kidney:blood (only for rainbow trout) partition coefficients of a chemical  

$$P_i = \frac{10^{0.72 \cdot \log K_{ow} + 1.04 \cdot \log(\alpha_i) + 0.86} + \gamma_i}{P_{bw}} \quad (\text{eq. S26})$$

- Richly perfused tissue:blood partition coefficient of a chemical  

$$P_r = P_l \quad (\text{eq. S27})$$

- Chemical amount in fat, poorly perfused and richly perfused compartments  

$$\frac{dA_i(t)}{dt} = Q_i \cdot \left( C_{art}(t) - \frac{A_i(t)}{V_i \cdot P_i} \right), \frac{\mu g}{h} \quad (\text{eq. S28})$$

- Chemical amount in the liver compartment  

$$\frac{dA_l(t)}{dt} = Q_r \cdot \frac{A_r(t)}{V_r \cdot P_r} + Q_l \cdot C_{art}(t) - (Q_r + Q_l) \cdot \frac{A_l(t)}{V_l \cdot P_l}, \frac{\mu g}{h} \quad (\text{eq. S29})$$

- Chemical amount in the kidney compartment (only for rainbow trout)  

$$\frac{dA_k(t)}{dt} = 0.6 \cdot Q_m(t) \cdot \frac{A_m(t)}{V_m \cdot P_m} + Q_k \cdot C_{art}(t) - (0.6 \cdot Q_m + Q_k) \cdot \frac{A_k(t)}{V_k \cdot P_k}, \frac{\mu g}{h} \quad (\text{eq. S30})$$

- Chemical internal concentration in the whole body of rainbow trout  

$$C_{int}(t) = \frac{A_f(t) + A_m(t) + A_r(t) + A_l(t) + A_k(t)}{1000 \cdot w_w}, \frac{\mu g}{g} \quad (\text{eq. S31})$$

- Chemical internal concentration in the whole body of fathead minnow  

$$C_{int}(t) = \frac{A_f(t) + A_m(t) + A_r(t) + A_l(t)}{1000 \cdot w_w}, \frac{\mu g}{g} \quad (\text{eq. S32})$$

- Chemical concentration in arterial blood  

$$C_{art}(t) = \min(Q_w, Q_c \cdot P_{bw}) \cdot \frac{C_w - \frac{C_{ven}(t)}{P_{bw}}}{Q_c} + C_{ven}(t), \frac{\mu g}{L} \quad (\text{eq. S33})$$

- Chemical concentration in venous blood of rainbow trout

$$C_{\text{ven}}(t) = \frac{Q_f \cdot \frac{A_f(t)}{V_f \cdot P_f} + 0.4 \cdot Q_m \cdot \frac{A_m(t)}{V_m \cdot P_m} + (0.6 \cdot Q_m + Q_k) \cdot \frac{A_k(t)}{V_k \cdot P_k} + (Q_r + Q_l) \cdot \frac{A_l(t)}{V_l \cdot P_l}}{Q_c}, \frac{\mu\text{g}}{\text{L}} \quad (\text{eq. S34})$$

- Chemical concentration in venous blood of fathead minnow

$$C_{\text{ven}}(t) = \frac{Q_f \cdot \frac{A_f(t)}{V_f \cdot P_f} + Q_m \cdot \frac{A_m(t)}{V_m \cdot P_m} + (Q_r + Q_l) \cdot \frac{A_l(t)}{V_l \cdot P_l}}{Q_c}, \frac{\mu\text{g}}{\text{L}} \quad (\text{eq. S35})$$

## 2.4. Model runs

All three toxicokinetic models were run in **ModelMaker 4** with the following settings:

### a) Run

- start value: 0,
- stop value: last day of exposure,
- repeated run: no.

### b) Integration

- random seed: 1,
- integration method: Runge-Kutta,
- output points: user defined (dependent on stop value)
- fixed step: no,
- accuracy:  $10^{-6}$ ,
- minimum value:  $10^{-10}$ ,
- approx no of steps: 100,
- error scaling: a constant value (10).

### 3. Results

#### 3.1. Predicted vs. measured internal concentrations of chemicals

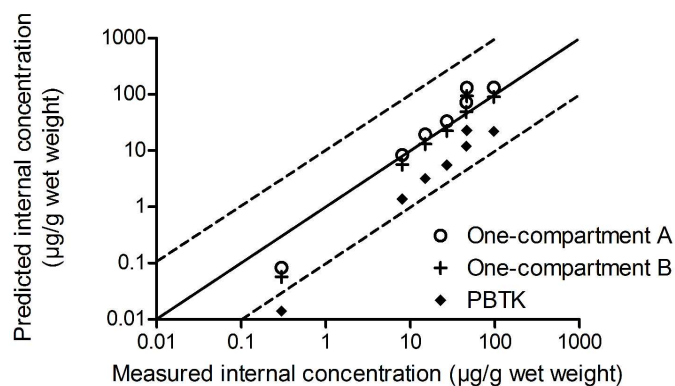

**Figure S1.** Comparison of predicted internal concentrations of hexachlorobenzene (based on one-compartment A, one-compartment B and PBTK models) and measured internal concentrations in fathead minnows.

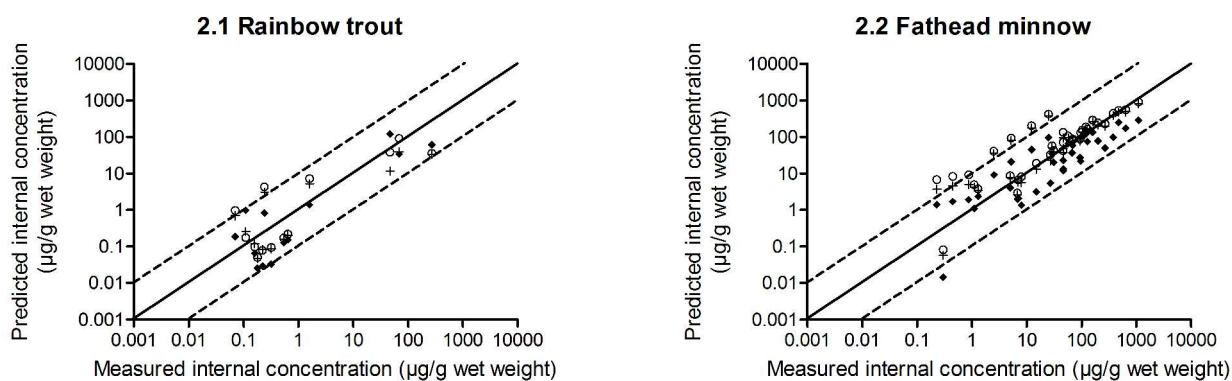

**Figure S2.** Comparison of TK models: One-compartment A (o), one-compartment B (+) and PBTK (◆), for the same chemicals for 2.1 rainbow trout and 2.2 fathead minnows (8 chemicals, 45 data points).

### 3.2. Sensitivity analysis

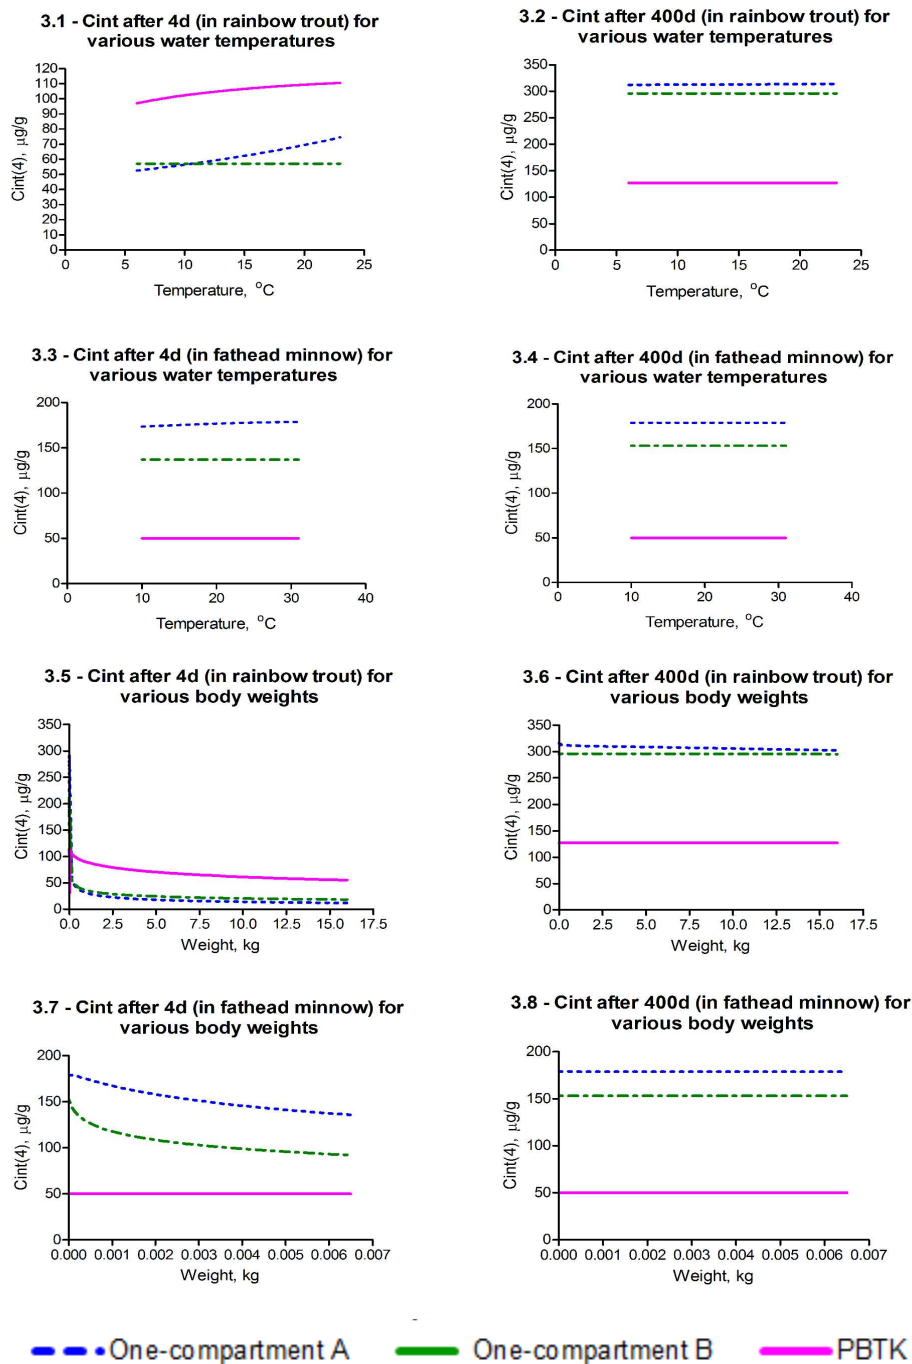

**Figure S3.** TK model predictions for rainbow trout and fathead minnows: 3.1 – 3.4: sensitivity analysis for water temperature, 3.5 – 3.8: sensitivity analysis for fish weight; experiment parameters for rainbow trout:  $\log K_{OW} = 4.4$ , fish weight = 0.13 kg, water temperature = 12.8 °C, lipid fraction = 0.12; experiment parameters for fathead minnow:  $\log K_{OW} = 4.4$ , fish weight = 0.00018 kg, water temperature = 24.8 °C, lipid fraction = 0.05.

Figure S3 shows that fish weight and water temperature have smaller impact on predicted internal concentrations of chemicals than chemical  $\log K_{OW}$  and fish lipid fraction. In addition, this influence is visible only under non steady state-conditions.

### 3.3. Predicted Chemical concentrations in various tissues and organs

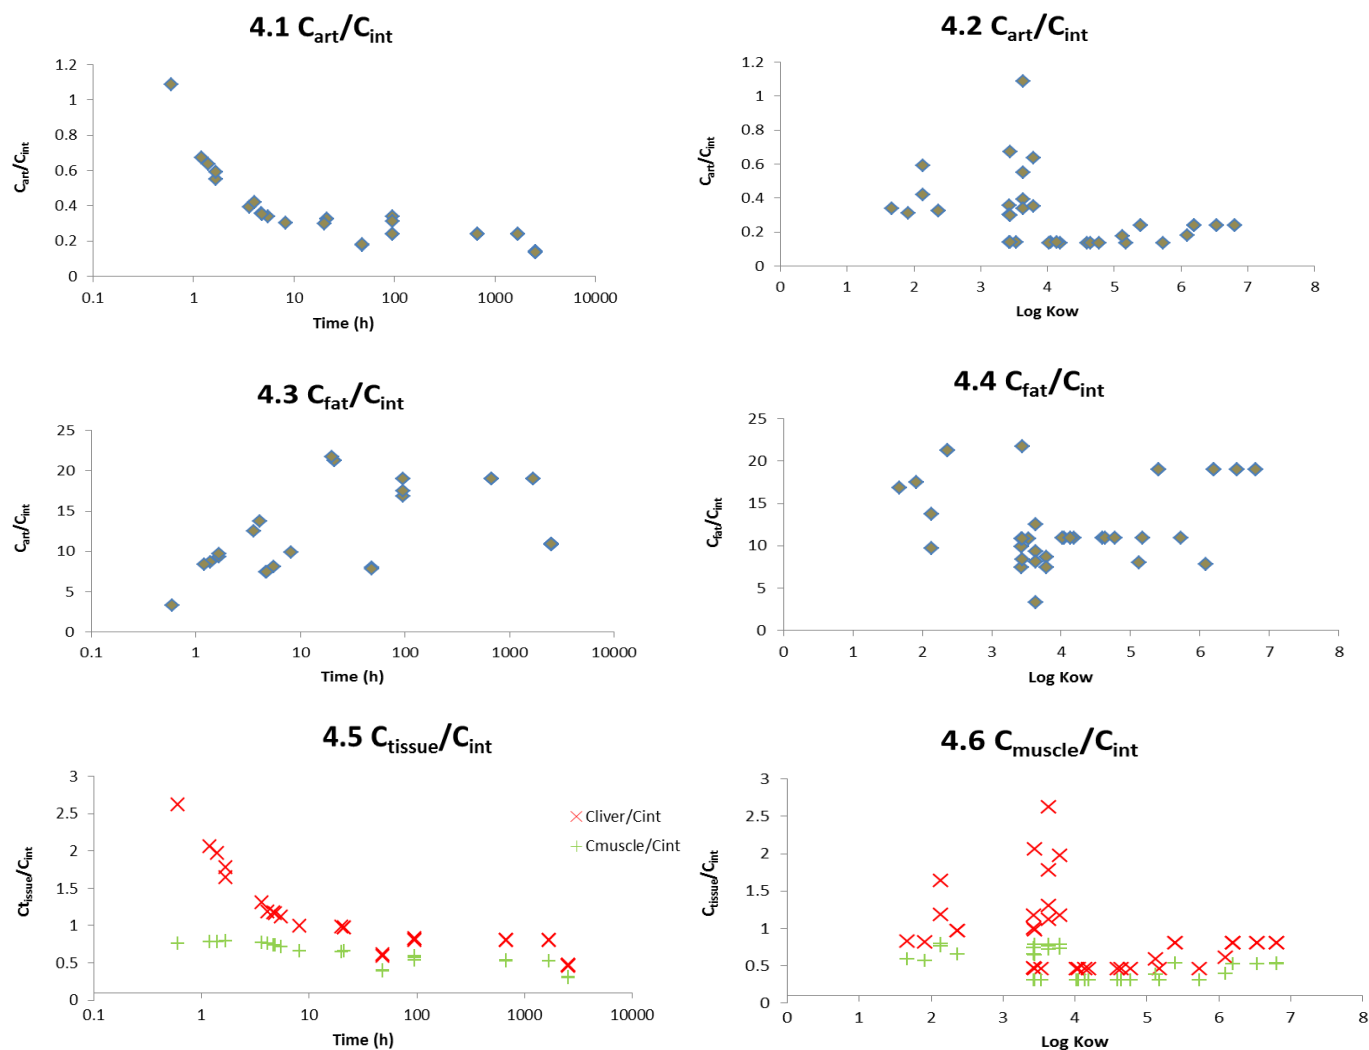

**Figure S4.** PBTK model predictions of chemical concentrations in rainbow trout tissues in comparison to their concentrations in the whole body ( $C_{int}$ ): 4.1, 4.3, 4.5: depending on exposure time 4.2, 4.4, 4.6: depending on log  $K_{OW}$ . Each point represents a model prediction corresponding to a measured internal concentration in the different experimental studies.

Figure S4 shows that there is a clear relationship between exposure time and chemical concentrations in arterial blood and some tissues while the relationship between log  $K_{OW}$  and chemical concentrations is not visible here. The relationship between exposure time and chemical concentrations in fat is not so clear; possibly a result of the fact that most of the chemical concentrates in fat and here steady-state conditions are reached later than in other tissues. It is generally thought that for constant exposure, chemical concentrations in whole body increase in time until steady-state conditions are reached; however, according to Figure S4, the  $C_{tissue}/C_{int}$  and  $C_{art}/C_{int}$  ratios (except of  $C_{fat}/C_{int}$ ) decrease in time. This is caused by the small volume of blood, low chemical concentrations in these tissues and high chemical concentration in fat. Thus, chemical concentrations in fat have an impact on the increase of chemical concentration in whole body and the decrease of other  $C_{tissue}/C_{int}$  ratios. However, according to

Figure S4, for long time exposure (longer than 100 h), the relationship between chemical concentrations does not change as much as during shorter exposure.

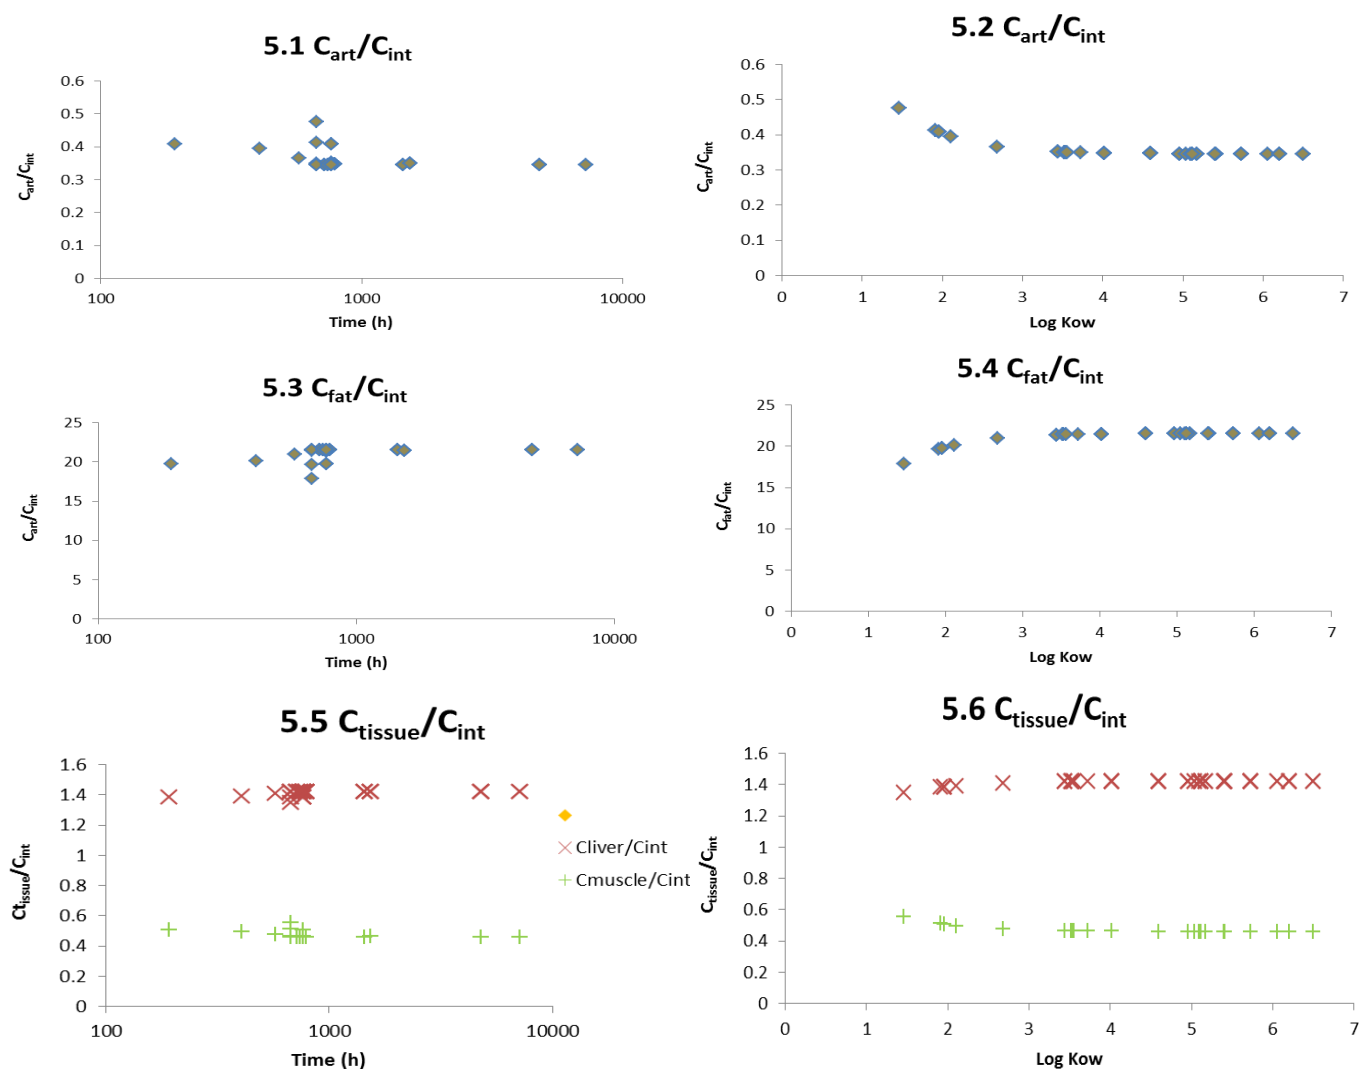

**Figure S5.** PBTK model predictions of chemical concentrations in fathead minnow tissues in comparison to their concentrations in the whole body ( $C_{int}$ ): 5.1, 5.3, 5.5: depending on exposure time 5.2, 5.4, 5.6: depending on log  $K_{OW}$ . Each point represents a model prediction corresponding to a measured internal concentration in the different experimental studies.

As opposite to Figure S4, Figure S5 shows that there is a relationship between log  $K_{OW}$  and chemical concentrations in tissues and no visible relationship between exposure time and chemical concentrations. This is due to different exposure time used in studies for rainbow trout and fathead minnow. As it was noticed for Figure S4, exposure time longer than 100 h did not have a clear impact on the relationship between chemical concentrations in different tissues which probably is caused by reaching steady-state conditions. However, Figure S5 shows, that even during steady-state conditions, the log  $K_{OW}$  influences  $C_{tissue}/C_{int}$  ratio. Thus, according to Figure S4 and Figure S5, both exposure time and log  $K_{OW}$  have an impact on the relationship between chemical concentrations in different tissues.



Note however, that the patterns shown in Figures S4 and S5 depend on the assumption made to parameterize the lipid content in tissues (eqs. S20 – S22). These patterns could change if a different relation between total and organ specific lipid content is assumed, especially for short exposures where steady-state is not approached.

#### 4. References

1. OECD, OECD Guideline for testing chemicals. Fish, Acute Toxicity Test. <http://www.oecd.org/dataoecd/17/20/1948241.pdf> **1992**, 203.
2. US EPA: Methods for Measuring the Acute Toxicity of Effluents and Receiving Waters to Freshwater and Marine Organisms. (04.06.2010 ),
3. Oliver, B. G.; Niimi, A. J., Bioconcentration of Chlorobenzenes from Water by Rainbow Trout: Correlations with Partition Coefficients and Environmental Residues. *Environ. Sci. Technol.* **1983**, 17, 287-291.
4. Carlson, A. R.; Kosian, P. A., Toxicity of Chlorinated Benzenes to Fathead Minnows (*Pimephales promelas*). *Arch. Environ. Contam. Toxicol.* **1987**, 16, 129-135.
5. Carlson, A. R., Effects of Lowered Dissolved Oxygen Concentration on the Toxicity of 1,2,4-Trichlorobenzene to Fathead Minnows. *Bull. Environ. Contam. Toxicology* **1987**, 38, 667-673.
6. van Wezel, A. P.; de Vries, D. A. M.; Kostense, S.; Sijm, D. T. H. M.; Opperhuizen, A., Intraspecies variation in lethal body burdens of narcotic compounds. *Aquat. Toxicol.* **1995**, 33, 325-342.
7. McKim, J. M.; Heath, E. M., Dose Determinations for Waterborne 2,5,2',5'-[<sup>14</sup>C]Tetrachlorobiphenyl and Related Pharmacokinetics in Two Species of Trout (*Salmo gairdneri* and *Salvelinus fontinalis*): A Mass-Balance Approach. *Toxicol. Appl. Pharmacol.* **1983**, 68, 177-187.
8. Mehrle, P. M.; Buckler, D. R.; Little, E. E.; Smith, L. M.; Petty, J. D.; Peterman, P. H.; Stalling, D. L.; de Greave, G. M.; Coyle, J. J.; Adams, W. J., Toxicity and Bioconcentration of 2,3,7,8-Tetrachlorodibenzodioxin and 2,3,7,8-Tatreachlorodibezofuran in Raibow Trout. *Environ. Toxicol. Chem.* **1988**, 7, 47-62.
9. Call, D. J.; Brooke, D. N.; Lu, P.-Y., Uptake, Elimination, and Metabolism of Three Phenols by Fathead Minnows. *Arch. Environ. Contam. Toxicol.* **1980**, 9, 699-714.
10. Howe, G. E.; Marking, L. L.; Bills, T. D.; Rach, J. J.; Mayer, F. L., Effects of Water Temperature and pH on Toxicity of Terbufos, Trichlorfon, 4-Nitrophenol and 2,4-Dinitrophenol to the Amphipod *Gammarus pseudolimnaeus* and Rainbow Trout (*Oncorhynchus mykiss*). *Environ. Toxicol. Chem.* **1994**, 13, 51-66.
11. Call, D. J.; Brooke, D. N.; Kent, R. J.; Poirier, S. H.; Knuth, M. L.; Shubat, P. J.; Slick, E. J., Toxicity, Uptake, and Elimination of the Herbicides Alachlor and Dinoseb in Freshwater Fish. *Journal of Environmental Quality* **1984**, 13, (3), 493-498.
12. Call, D. J.; Brooke, L. T.; Kent, R. J.; Knuth, M. L.; Poirier, S. H.; Huot, J. M.; Lima, A. R., Bromacil and Diuron Herbicides: Toxicity, Uptake, and Elimination in Freshwater Fish. *Arch. Environ. Contam. Toxicol.* **1987**, 16, 607-613.
13. Buckler, D. R.; Witt, A.; Mayer, F. L.; Huckins, J. N., Acute and Chronic Effects of Kepone and Mirex on the Fathead Minnow. *Transactions of the American Fisheries Society* **1981**, 110, 270-280.

14. Jarvinen, A. W.; Nordling, B. R.; Henry, M. E., Chronic Toxicity of Dursban (Chlorpyrifos) to the Fathead Minnow (*Pimephales promelas*) and the Resultant Acetylcholinesterase Inhibition. *Ecotox. Environ. Safe.* **1983**, *7*, 423-434.
15. Spehar, R. L.; Tanner, D. K.; Gibson, J. H., Effects of Kelthane and Pydrin on Early Life Stages of Fathead Minnows (*Pimephales promelas*) and Amphipods (*Hyalella azteca*). *Aquatic Toxicology and Hazard Assessment: Fifth Conference* **1982**, 234-244.
16. Shubat, P. J.; Curtis, L. R., Ration and Toxicant Preexposure Influence Dieldrin Accumulation by Rainbow Trout (*Salmon gairdneri*). *Environ. Toxicol. Chem.* **1986**, *5*, 69-77.
17. Versteeg, D. J.; Rawlings, J. M., Bioconcentration and Toxicity of of Dodecylbenzene Sulfonate (C12LAS) to Aquatic Organisms Exposed in Experimental Streams. *Arch. Environ. Contam. Toxicol.* **2003**, *44*, 237-246.
18. Jarvinen, A. W.; Tyo, R. M., Toxicity to Fathead Minnows of Endrin in Food and Water. *Arch. Environ. Contam. Toxicol.* **1978**, *7*, 409-42.
19. Curtis, L. R.; Seim, W. K.; Chapman, G. A., Toxicity of Fenvelerate to Developing Steelhead Trout Following Conntinuous or Intermittent Exposure. *Journal of Toxicology and Environmental Health* **1985**, *15*, 445-457.
20. Spehar, R. L.; Tanner, D. K.; Nordling, B. R., Toxicity of the Synthetic Pyrethroids, Permethin and AC 222, 705 and their Accumulation in Early Life Stages of Fathead Minnow and Snails *Aquat. Toxicol.* **1983**, *3*, 171-182.
21. Nebeker, A. V.; Griffis, W. L.; Wise, C. M.; Hopkins, E.; Barbitta, E. H., Survival, Reproduction and Bioconcentration in Invertebrates and Fish Exposed to Hexachlorobenzene. *Environ. Toxicol. Chem.* **1989**, *8*, 601-611.
22. Spehar, R. L.; Veith, G. D.; DeFoe, D. L.; Bergstedt, B. V., Toxicity and Bioaccumulation of Hexachlorocyclopentadiene, Hexachloronorbordadiene and Heptachloronorborene in Larval and Early Juvenile Fathead Minnows, *Pimephales promelas*. *Bulletin pf Environmental Contamination & Toxicology* **1979**, *21*, 576-583.
23. Fackler, P. H.; Dionne, E.; Hartley, D. A.; Hamlink, J. L., Bioconcentration by Fish of a Highly Volatile Silicone Compound in a Totally Enclosed Aquatic Exposure System. *Environ. Toxicol. Chem.* **1995**, *14*, (10), 1649-1656.
24. McKim, J. M.; Schmieder, P. K.; Erickson, R. J., Toxicokinetic Modeling of [<sup>14</sup>C]Pentachlorophenol in the Rainbow Trout (*Salmo gairdneri*). *Aquat. Toxicol.* **1986**, *9*, 59-80.
25. Spehar, R. L.; Nelson, H. P.; Swanson, M. J.; Renoos, J. W., Pentachlorophenol Toxicity to Amphipods and Fathead Minnows at Different Test ph Values. *Environ. Toxicol. Chem.* **1985**, *4*, 389-397.
26. Garber, K.; Peck, C., Risks of Dicofol Use to Federally Threatened California Red-legged Frog (*Rana aurora draytonii*). *Environmental Fate and Effects Division Office of Pesticide Programs Washington, D.C. 20460* **2009**, 147.
27. Arnot, J. A.; Gobas, F., A food web bioaccumulation model for organic chemicals in aquatic ecosystems. *Environ. Toxicol. Chem.* **2004**, *23*, (10), 2343-2355.
28. Braunbeck, T.; Hinton, D. E.; Streit, B., Fish ecotoxicology. *Birkäuser* **1998**.
29. deBruyn, A. M. H.; Gobas, F. A. P. C., The sorptive capacity of animal protein. *Environ. Toxicol. Chem.* **2007**, *26*, (9), 1803-1808.
30. Hendriks, A. J.; van der Linde, A.; Cornelissen, G.; Sijm, D., The power of size. 1. Rate constants and equilibrium ratios for accumulation of organic substances related to octanol-water partition ratio and species weight. *Environ. Toxicol. Chem.* **2001**, *20*, (7), 1399-1420.
31. Erickson, R. J.; McKim, J. M., A model for exchange of organic chemicals at fish gills: Flow and diffusion limitations. **1990**.

32. Lien, G. J.; McKim, J. M., Predicting branchial and cutaneous uptake of 2,2',5,5'-tetrachlorobiphenyl in fathead minnows (*Pimephales promelas*) and Japanese medaka (*Oryzias latipes*): Rate limiting factors. *Aquat. Toxicol.* **1993**, *27*, 15-32.
33. Nichols, J. W.; McKim, J. M.; Andersen, M. E.; Gargas, M. L.; Ckewell, H. J.; Erickson, R. J., A Physiologically Based Toxicokinetic Model for the Uptake and Disposition of Waterborne Organic Chemicals in Fish. *Toxicol. Appl. Pharmacol.* **1990**, *106*, 433-447.
34. Nichols, J. W.; McKim, J. M.; Lien, G. J.; Hoffman, A. D.; Bertelsen, S. L., Physiologically Based Toxicokinetic Modeling of Three Waterborne Chloroethanes in Rainbow Trout (*Oncorhynchus*). *Toxicol. Appl. Pharmacol.* **1991**, *110*, 374-389.
35. Soderberg, R. W., Flowing Water Fish Culture. *Lewis Publishers* **1994**, pp. 147.
36. Bertelsen, S. L.; Hoffman, A. D.; Gallinat, C. A.; Elonen, C. M.; Nichols, J. W., Evaluation of Log  $K_{ow}$  and Tissue Lipid Content as Predictors of Chemical Partitioning to Fish Tissues. **1998**.
37. Lien, G. J.; Nichols, J. W.; McKim, J. M.; Gallinat, C. A., Modeling the accumulation of three waterborne chlorinated ethanes in fathead minnows (*Pimephales promelas*): A physiologically based approach *Environ. Toxicol. Chem.* **1994**, *13*, (7), 1195-1205.
38. Watanabe, K. H.; Li, Z.; Kroll, K. J.; Villeneuve, D. L.; Garcia-Reyero, N.; Orlando, E. F.; Sepulveda, M. S.; Collette, T. W.; Ekman, D. R.; Ankley, G. T.; Denslow, N. D., A Computational Model of the Hypothalamic-Pituitary-Gonadal Axis in Male Fathead Minnows Exposed to 17 $\alpha$ -Ethinylestradiol and 17 $\beta$ -Estradiol. *Toxicological Sciences* **2009**, *109*, (2), 180-192.
39. Nichols, J. W.; Jensen, K. M.; Tietge, J. E.; Johnson, R. D., Physiologically based toxicokinetic model for maternal transfer of 2,3,7,8-tetrachlorodibenzo-p-dioxin in brook trout (*salvelinus fontinalis*) *Environ. Toxicol. Chem.* **1998**, *17*, 2422-2434.
